# Supplementary material for: Serine palmitoyltransferase assembles at ER–mitochondria contact sites
Source: Life Sci Alliance. 2021 Nov 16;5(2):e202101278. doi: 10.26508/lsa.202101278 (PMC8605320; doi:10.26508/lsa.202101278)
Supplement: Supplementary file 7 [file LSA-2021-01278_TableS1.xls]

## Sheet: Legend
Quantification of newly synthesized sphingolipids in cells by liquid chromatography-mass spectrometry (LC-ESI-MS/MS).
List of identified sphingolipid species and their abundance in A431 control, KO, KO rescued with WT-, ER-, or OM-SPTLC2-FLAG.
Values were normalized to number of cells.
A bar chart is provided with mean values of individual lipid species.
Sph = Sphingosine
Cer = Ceramide
HexCer = Hexosylceramide (glucosyl- and galactosylceramides)
LacCer = Lactosylceramide

## Sheet: Table_S1_Lipids cells
AVERAGE
pmol/10^6 cells	CTRL	KO	KO+WT-SPTLC2-FLAG	KO+ER-SPTLC2-FLAG	KO+OM-SPTLC2-FLAG	CTRL+MYRIOCIN	KO+MYRIOCIN	KO+WT-SPTLC2-FLAG+MYRIOCIN	KO+ER-SPTLC2-FLAG+MYRIOCIN	KO+OM-SPTLC2-FLAG+MYRIOCIN
Sph(d18:1)	65.4653	10.9161	206.272	8.9649	12.1906	6.38834	6.35588	10.9241	5.97222	10.2644
Cer(d18:1/12:0)	0.308496	0	1.28754	0	0	0	0	0	0	0
Cer(d18:1/14:0)	5.50417	0	22.624	0	0	0	0	0	0	0
Cer(d18:1/16:0)	13.3057	0	53.2695	0	0	0	0	0	0	0
Cer(d18:0/16:0)	3.0085	0	10.2249	0	0	0	0	0	0	0.563122
Cer(d18:1/18:0)	2.40242	0	15.9153	0	0	0	0	0	0	0.206177
Cer(d18:1/20:0)	2.43216	1.16506	18.5322	0.327634	0.564133	0.471867	0.303467	0.476838	0.386422	0.307383
Cer(d18:1/22:1)	6.41836	0	24.8538	0	0	0	0	0	0	0
Cer(d18:1/22:0)	48.6802	0	201.906	0	0	0	0.50825	0	0	0
Cer(d18:1/23:1)	7.27508	0	29.3258	0	0	0	0	0	0	0
Cer(d18:1/23:0)	11.3605	0	31.1252	0	0.00949824	0	0	0	0	0
Cer(d18:1/25:1)	3.20958	0	7.07621	0	0	0.170002	0	0.12761	0	0
Cer(d18:1/24:1)	585.602	2.06724	1393.34	1.04035	3.61048	0.173461	0	1.17671	0	0
Cer(d18:1/24:0)	481.032	0.787558	1023.2	0	3.67999	0	0	1.3007	0	0
Cer(d18:1/23:0(OH))	53.0083	0	105.812	0	0.181874	0	0	0	0	0
Cer(d18:1/25:0)	15.974	0	24.7001	0	0	0	0	0	0	0
Cer(d18:1/24:0(OH))	29.4066	0	47.2222	0	0	0	0	0	0	0
Cer(d18:0/24:0)	3.68221	0	5.57771	0	0	0	0	0	0	0
Cer(d18:1/26:1)	53.7786	0	80.627	0	0	0	0	0	0	0
Cer(d18:1/26:0)	22.0333	0	36.2776	0	0	0	0	0	0	0
Cer(d18:1/25:0(OH))	2.54196	0	3.63613	0	0	0	0	0	0	0
HexCer(d18:1/14:0)	4.22927	0	18.2387	0	0.042694	0	0	0	0	0
HexCer(d18:1/15:0)	1.48627	0	7.37978	0	0	0.00335995	0	0	0	0
HexCer(d18:1/16:0)	68.1821	1.26784	241.323	0	0.892028	0	0	0	0	0
HexCer(d18:1/17:0)	0.562341	0	3.6653	0	0	0.073836	0	0.0857076	0	0
HexCer(d18:1/18:0)	1.46402	0	7.99517	0	0	0	0	0	0	0
HexCer(d18:1/19:1)	4.13963	0	16.4065	0	0	0	0	0	0	0
HexCer(d18:1/19:0)	2.9815	0	9.04608	0	0	0	0	0	0	0
HexCer(d18:1/20:0)	1.32184	0	7.06764	0	0	0.00383368	0	0	0	0
HexCer(d18:1/21:1)	1.89353	0	7.25248	0	0	0	0	0	0	0
HexCer(d18:1/21:0)	0.300403	0	3.67448	0	0	0	0	0	0	0
HexCer(d18:1/22:1)	11.2505	0	40.2761	0	0	0	0	0	0	0
HexCer(d18:1/22:0)	118.606	0	497.14	0	1.30141	0.0912218	0	1.17379	0	0
HexCer(d18:1/22:2(OH))	11.157	0	39.5924	0	0	0	0	0.00472888	0	0
HexCer(d18:1/23:0)	38.9031	0	91.38	0	0	0	0	0	0	0
HexCer(d18:1/22:0(OH))	24.9895	0	90.7606	0	0	0	0	0	0	0
HexCer(d18:2/24:1)	29.773	0.0482144	58.6646	0	0	0	0.0156331	0	0	0
HexCer(d18:1/24:2)	13.1541	0	39.5249	0	0	0	0	0	0	0
HexCer(d18:1/24:1)	636.13	3.9868	1620.53	0.715591	4.39648	0.248747	0	1.91223	0	0
HexCer(d18:1/24:0)	746.877	4.53112	1524.1	1.23928	6.65765	1.97434	0	3.23321	0	0
HexCer(d18:1/25:1)	13.1207	0	26.1774	0	0	0	0	0.0919304	0	0
HexCer(d18:1/24:1(OH))	33.497	0.129542	71.6696	0	0	0.103517	0	0	0	0
HexCer(d18:1/25:0)	20.1173	0	29.3724	0	0	0.192018	0	0.715128	0	0
HexCer(d18:1/24:0(OH))	158.473	0.971835	269.349	0	2.34569	0.288976	0	0.642921	0	0
HexCer(d18:1/26:1)	58.4356	0	81.9949	0	0	0	0	0	0	0
HexCer(d18:1/26:0)	35.8838	0	55.077	0	0	0	0	0	0	0
LacCer(d18:1/14:0)	1.32562	0	33.8992	0	0	0	0	0	0	0
LacCer(d18:1/16:0)	11.0383	0	233.255	0	0	0	0	0.592815	0	0
LacCer(d18:1/22:0)	10.3654	0	226.545	0	0	0	0	1.16716	0	0
LacCer(d18:1/24:2)	0.237049	0	14.1273	0	0	0	0	0	0	0
LacCer(d18:1/24:1)	32.538	0	508.206	0	0	0	0	0.627759	0	0
LacCer(d18:1/24:0)	31.6826	0.214486	452.028	0	0	0.0674237	0	2.10272	0	0
Gala1-4GalB1-4GlcB-Cer(d18:1/22:0)	24.6679	0	43.5004	0	0	0	0	0	0	0
Gala1-4GalB1-4GlcB-Cer(d18:1/24:1)	33.1447	0	36.0152	0	0	0	0	0	0	0
Total identified sphingolipids	3598.36	26.0858	9748.04	12.2878	35.8726	10.2509	7.18323	26.356	6.35864	11.3411
