# Supplementary material for: Serine palmitoyltransferase assembles at ER–mitochondria contact sites
Source: Life Sci Alliance. 2021 Nov 16;5(2):e202101278. doi: 10.26508/lsa.202101278 (PMC8605320; doi:10.26508/lsa.202101278)
Supplement: Supplementary file 10 [file LSA-2021-01278_SdataTS1.S3.xls]

## Sheet: Source Data_Dataset EV1
	A431 CTRL			SPTLC2-KO			SPTLC2-KO+WT-SPTLC2-FLAG			SPTLC2-KO+ER-SPTLC2-FLAG			SPTLC2-KO+OM-SPTLC2-FLAG			A431 CTRL			SPTLC2-KO			SPTLC2-KO+WT-SPTLC2-FLAG			SPTLC2-KO+ER-SPTLC2-FLAG			SPTLC2-KO+OM-SPTLC2-FLAG
pmol/10^6 cells	CTRL-1	CTRL-2	CTRL-3	KO-1	KO-2	KO-3	KO+WT-SPTLC2-FLAG-1	KO+WT-SPTLC2-FLAG-2	KO+WT-SPTLC2-FLAG-3	KO+ER-SPTLC2-FLAG-1	KO+ER-SPTLC2-FLAG-2	KO+ER-SPTLC2-FLAG-3	KO+OM-SPTLC2-FLAG-1	KO+OM-SPTLC2-FLAG-2	KO+OM-SPTLC2-FLAG-3	CTRL+MYRIOCIN-1	CTRL+MYRIOCIN-2	CTRL+MYRIOCIN-3	KO+MYRIOCIN-1	KO+MYRIOCIN-2	KO+MYRIOCIN-3	KO+WT-SPTLC2-FLAG+MYRIOCIN-1	KO+WT-SPTLC2-FLAG+MYRIOCIN-2	KO+WT-SPTLC2-FLAG+MYRIOCIN-3	KO+ER-SPTLC2-FLAG+MYRIOCIN-1	KO+ER-SPTLC2-FLAG+MYRIOCIN-2	KO+ER-SPTLC2-FLAG+MYRIOCIN-3	KO+OM-SPTLC2-FLAG+MYRIOCIN-1	KO+OM-SPTLC2-FLAG+MYRIOCIN-2	KO+OM-SPTLC2-FLAG+MYRIOCIN-3				Multiple students t-tests. Corrected for multiple comparisons using Holm-Sidak method. Each row was analyzed individually, without assuming a consistent SD. Number of t tests: 5.
Sph(d18:1)	108.61	83.966	3.82011	11.4184	9.5342	11.7955	162.543	225.186	231.087	9.41543	8.77081	8.70846	13.3727	12.7381	10.4612	7.13787	8.14288	3.88427	7.54074	7.58156	3.94534	10.0021	10.0397	12.7303	7.21565	5.52034	5.18067	20.8352	6.22972	3.72835
Cer(d18:1/12:0)	0.411873	0.358858	0.154757	0	0	0	0.864225	1.73353	1.26488	0	0	0	0	0	0	0	0	0	0	0	0	0	0	0	0	0	0	0	0	0				Untreated vs MYRIOCIN treated:
Cer(d18:1/14:0)	5.7801	6.29468	4.43773	0	0	0	19.4831	26.6487	21.7403	0	0	0	0	0	0	0	0	0	0	0	0	0	0	0	0	0	0	0	0	0					Significant?	P value	Mean of (-)	Mean of +MYRIOCIN	Difference	SE of difference	t ratio	df	Adjusted P Value
Cer(d18:1/16:0)	12.9226	16.0789	10.9158	0	0	0	55.7775	51.4857	52.5454	0	0	0	0	0	0	0	0	0	0	0	0	0	0	0	0	0	0	0	0	0				A431 CTRL	Yes	0.002709	3598	10.25	3588	542.5	6.614	4	0.009522
Cer(d18:0/16:0)	3.63539	3.4131	1.97703	0	0	0	13.9707	8.43978	8.2642	0	0	0	0	0	0	0	0	0	0	0	0	0	0	0	0	0	0	1.68937	0	0				SPTLC2-KO	Yes	0.017406	26.09	7.183	18.9	4.835	3.909	4	0.034509
Cer(d18:1/18:0)	2.01925	3.3978	1.79022	0	0	0	17.1315	15.9211	14.6933	0	0	0	0	0	0	0	0	0	0	0	0	0	0	0	0	0	0	0.61853	0	0				SPTLC2-KO+WT-SPTLC2	Yes	<0.000001	9748	26.36	9722	158.8	61.24	4	2e-06
Cer(d18:1/20:0)	2.57797	2.55924	2.15925	1.48663	0.86071	1.14785	21.8022	16.8195	16.9748	0	0	0.982903	0	0.784094	0.908304	0	0.798213	0.617389	0	0	0.910402	0	0	1.43051	0	0	1.15927	0	0	0.922149				SPTLC2-KO+ER-SPTLC2	Yes	0.002389	12.29	6.359	5.929	0.8667	6.841	4	0.009522
Cer(d18:1/22:1)	6.26755	7.41439	5.57314	0	0	0	22.4481	28.3135	23.7997	0	0	0	0	0	0	0	0	0	0	0	0	0	0	0	0	0	0	0	0	0				SPTLC2-KO+OM-SPTLC2	Yes	0.020029	35.87	11.34	24.53	6.55	3.745	4	0.034509
Cer(d18:1/22:0)	61.6623	53.7315	30.6469	0	0	0	234.378	190.164	181.174	0	0	0	0	0	0	0	0	0	0	0	1.52475	0	0	0	0	0	0	0	0	0
Cer(d18:1/23:1)	8.11396	8.14898	5.5623	0	0	0	27.4662	31.2231	29.2882	0	0	0	0	0	0	0	0	0	0	0	0	0	0	0	0	0	0	0	0	0
Cer(d18:1/23:0)	11.8944	13.985	8.20205	0	0	0	28.3184	31.7982	33.259	0	0	0	0	0.0284947	0	0	0	0	0	0	0	0	0	0	0	0	0	0	0	0					Significant?	P value	Mean of CTRL	Mean of KO	Difference	SE of difference	t ratio	df	Adjusted P Value
Cer(d18:1/25:1)	3.70605	3.27272	2.64996	0	0	0	6.80558	6.8264	7.59665	0	0	0	0	0	0	0.186076	0.161624	0.162305	0	0	0	0.38283	0	0	0	0	0	0	0	0				KO (-) vs CTRL (-)	Yes	0.002754	3598	26.09	3572	542.5	6.585	4	0.005501
Cer(d18:1/24:1)	661.61	655.517	439.679	0	2.54579	3.65594	1113.47	1579.64	1486.91	0.647987	1.40239	1.07068	4.09668	3.68226	3.0525	0	0	0.520382	0	0	0	0.640798	1.29774	1.59161	0	0	0	0	0	0
Cer(d18:1/24:0)	631.294	512.913	298.889	0	0	2.36267	1116.61	1001.39	951.598	0	0	0	4.69055	3.54084	2.80859	0	0	0	0	0	0	0.849709	1.71844	1.33395	0	0	0	0	0	0					Significant?	P value	Mean of CTRL	Mean of KO+WT	Difference	SE of difference	t ratio	df	Adjusted P Value
Cer(d18:1/23:0(OH))	74.3353	55.5276	29.1619	0	0	0	129.056	96.9978	91.3827	0	0	0	0.302296	0.243326	0	0	0	0	0	0	0	0	0	0	0	0	0	0	0	0				KO+WT (-) vs CTRL (-)	Yes	0.000405	3598	9748	-6150	565.2	10.88	4	0.00081
Cer(d18:1/25:0)	21.1217	15.9162	10.884	0	0	0	23.1824	24.9367	25.9814	0	0	0	0	0	0	0	0	0	0	0	0	0	0	0	0	0	0	0	0	0
Cer(d18:1/24:0(OH))	26.2832	32.8359	29.1008	0	0	0	25.772	59.4035	56.491	0	0	0	0	0	0	0	0	0	0	0	0	0	0	0	0	0	0	0	0	0					Significant?	P value	Mean of KO	Mean of KO+WT	Difference	SE of difference	t ratio	df	Adjusted P Value
Cer(d18:0/24:0)	3.95191	3.90845	3.18626	0	0	0	3.91336	6.42339	6.39638	0	0	0	0	0	0	0	0	0	0	0	0	0	0	0	0	0	0	0	0	0				KO+WT (-) vs KO (-)	Yes	<0.000001	26.09	9748	-9722	158.8	61.23	4	<0.000001
Cer(d18:1/26:1)	63.7244	54.5359	43.0756	0	0	0	64.3941	87.4204	90.0665	0	0	0	0	0	0	0	0	0	0	0	0	0	0	0	0	0	0	0	0	0
Cer(d18:1/26:0)	30.1462	21.5843	14.3693	0	0	0	37.9514	34.293	36.5885	0	0	0	0	0	0	0	0	0	0	0	0	0	0	0	0	0	0	0	0	0					Significant?	P value	Mean of KO	Mean of KO+OM	Difference	SE of difference	t ratio	df	Adjusted P Value
Cer(d18:1/25:0(OH))	4.12002	2.14918	1.35667	0	0	0	4.17632	3.50396	3.22812	0	0	0	0	0	0	0	0	0	0	0	0	0	0	0	0	0	0	0	0	0				KO+OM (-) vs KO (-)	No	0.154087	26.09	35.87	-9.787	5.576	1.755	4	0.28443
HexCer(d18:1/14:0)	5.12797	4.22235	3.33748	0	0	0	18.4182	19.399	16.8988	0	0	0	0	0.128082	0	0	0	0	0	0	0	0	0	0	0	0	0	0	0	0
HexCer(d18:1/15:0)	1.73467	1.91909	0.80504	0	0	0	8.49914	7.41277	6.22743	0	0	0	0	0	0	0	0.0100798	0	0	0	0	0	0	0	0	0	0	0	0	0					Significant?	P value	Mean of KO+ER	Mean of KO	Difference	SE of difference	t ratio	df	Adjusted P Value
HexCer(d18:1/16:0)	73.335	80.0624	51.1488	1.11023	1.08448	1.60881	250.107	226.559	247.304	0	0	0	0.429739	1.36661	0.879741	0	0	0	0	0	0	0	0	0	0	0	0	0	0	0				KO+ER (-) vs KO (-)	No	0.04723	12.29	26.09	-13.8	4.871	2.832	4	0.092229
HexCer(d18:1/17:0)	0.648917	0.630924	0.40718	0	0	0	5.17213	2.95721	2.86656	0	0	0	0	0	0	0	0	0.221508	0	0	0	0	0	0.257123	0	0	0	0	0	0
HexCer(d18:1/18:0)	1.30988	1.99738	1.08479	0	0	0	8.86962	7.06827	8.04763	0	0	0	0	0	0	0	0	0	0	0	0	0	0	0	0	0	0	0	0	0
HexCer(d18:1/19:1)	2.71912	5.00682	4.69294	0	0	0	9.85485	18.8515	20.5132	0	0	0	0	0	0	0	0	0	0	0	0	0	0	0	0	0	0	0	0	0
HexCer(d18:1/19:0)	3.39461	3.65688	1.89301	0	0	0	9.47085	9.0777	8.5897	0	0	0	0	0	0	0	0	0	0	0	0	0	0	0	0	0	0	0	0	0
HexCer(d18:1/20:0)	1.34359	1.49333	1.1286	0	0	0	8.43456	5.63271	7.13565	0	0	0	0	0	0	0	0.011501	0	0	0	0	0	0	0	0	0	0	0	0	0
HexCer(d18:1/21:1)	2.33936	2.20114	1.14009	0	0	0	10.8863	5.40117	5.46998	0	0	0	0	0	0	0	0	0	0	0	0	0	0	0	0	0	0	0	0	0
HexCer(d18:1/21:0)	0	0.467289	0.433921	0	0	0	5.25622	2.52497	3.24226	0	0	0	0	0	0	0	0	0	0	0	0	0	0	0	0	0	0	0	0	0
HexCer(d18:1/22:1)	10.279	14.0831	9.3894	0	0	0	37.9153	39.0271	43.8858	0	0	0	0	0	0	0	0	0	0	0	0	0	0	0	0	0	0	0	0	0
HexCer(d18:1/22:0)	150.326	136.536	68.9542	0	0	0	653.447	425.002	412.971	0	0	0	0.910543	1.73264	1.26106	0	0	0.273666	0	0	0	1.13835	1.09124	1.29179	0	0	0	0	0	0
HexCer(d18:1/22:2(OH))	11.2243	14.4098	7.83702	0	0	0	42.423	38.629	37.7253	0	0	0	0	0	0	0	0	0	0	0	0	0.0141866	0	0	0	0	0	0	0	0
HexCer(d18:1/23:0)	49.5419	44.3248	22.8426	0	0	0	100.801	85.6861	87.6526	0	0	0	0	0	0	0	0	0	0	0	0	0	0	0	0	0	0	0	0	0
HexCer(d18:1/22:0(OH))	24.9241	28.2788	21.7656	0	0	0	81.4551	95.885	94.9418	0	0	0	0	0	0	0	0	0	0	0	0	0	0	0	0	0	0	0	0	0
HexCer(d18:2/24:1)	24.9662	36.4123	27.9407	0	0.144643	0	43.7842	63.1018	69.1076	0	0	0	0	0	0	0	0	0	0	0.0468993	0	0	0	0	0	0	0	0	0	0
HexCer(d18:1/24:2)	13.3491	16.0423	10.071	0	0	0	38.0692	40.2041	40.3014	0	0	0	0	0	0	0	0	0	0	0	0	0	0	0	0	0	0	0	0	0
HexCer(d18:1/24:1)	715.724	716.417	476.25	1.75798	4.28416	5.91827	1432.83	1725.46	1703.31	0	1.39488	0.751894	3.16511	5.48856	4.53577	0	0	0.746241	0	0	0	0.929676	2.25328	2.55373	0	0	0	0	0	0
HexCer(d18:1/24:0)	908.826	833.743	498.062	3.51252	4.72877	5.35207	1596.12	1490.18	1486.01	0.825196	1.67732	1.21534	6.11921	8.17787	5.67588	1.7304	2.51519	1.67743	0	0	0	1.78143	3.54803	4.37018	0	0	0	0	0	0
HexCer(d18:1/25:1)	15.6033	14.7495	9.00934	0	0	0	25.8186	27.3284	25.385	0	0	0	0	0	0	0	0	0	0	0	0	0	0.275791	0	0	0	0	0	0	0
HexCer(d18:1/24:1(OH))	27.1397	36.5496	36.8017	0	0.388625	0	41.0864	91.3718	82.5506	0	0	0	0	0	0	0.31055	0	0	0	0	0	0	0	0	0	0	0	0	0	0
HexCer(d18:1/25:0)	24.9333	21.8466	13.572	0	0	0	25.4098	30.9936	31.7137	0	0	0	0	0	0	0	0.576054	0	0	0	0	0.751799	1.39358	0	0	0	0	0	0	0
HexCer(d18:1/24:0(OH))	158.441	174.41	142.569	0	0	2.91551	196.411	311.316	300.32	0	0	0	1.72111	3.26564	2.05032	0	0	0.866929	0	0	0	0	0	1.92876	0	0	0	0	0	0
HexCer(d18:1/26:1)	62.3338	63.7028	49.2701	0	0	0	66.2509	90.0105	89.7232	0	0	0	0	0	0	0	0	0	0	0	0	0	0	0	0	0	0	0	0	0
HexCer(d18:1/26:0)	47.9368	37.304	22.4106	0	0	0	52.7515	54.8906	57.5889	0	0	0	0	0	0	0	0	0	0	0	0	0	0	0	0	0	0	0	0	0
LacCer(d18:1/14:0)	1.53607	1.64589	0.794904	0	0	0	34.128	35.2228	32.3469	0	0	0	0	0	0	0	0	0	0	0	0	0	0	0	0	0	0	0	0	0
LacCer(d18:1/16:0)	15.9814	11.7759	5.35749	0	0	0	285.931	215.894	197.94	0	0	0	0	0	0	0	0	0	0	0	0	0.86436	0	0.914085	0	0	0	0	0	0
LacCer(d18:1/22:0)	11.2394	14.592	5.26477	0	0	0	275.501	215.551	188.582	0	0	0	0	0	0	0	0	0	0	0	0	1.02602	1.05965	1.41581	0	0	0	0	0	0
LacCer(d18:1/24:2)	0.711148	0	0	0	0	0	13.5512	13.5626	15.2682	0	0	0	0	0	0	0	0	0	0	0	0	0	0	0	0	0	0	0	0	0
LacCer(d18:1/24:1)	30.385	44.2113	23.0177	0	0	0	421.223	582.323	521.072	0	0	0	0	0	0	0	0	0	0	0	0	0	0	1.88328	0	0	0	0	0	0
LacCer(d18:1/24:0)	40.1975	39.0942	15.7561	0	0	0.643459	466.05	458.444	431.591	0	0	0	0	0	0	0	0	0.202271	0	0	0	1.53142	2.26851	2.50823	0	0	0	0	0	0
Gala1-4GalB1-4GlcB-Cer(d18:1/22:0)	30.1582	28.1753	15.6702	0	0	0	57.3676	37.6716	35.4621	0	0	0	0	0	0	0	0	0	0	0	0	0	0	0	0	0	0	0	0	0
Gala1-4GalB1-4GlcB-Cer(d18:1/24:1)	35.9366	38.7926	24.7048	0	0	0	33.779	33.3831	40.8835	0	0	0	0	0	0	0	0	0	0	0	0	0	0	0	0	0	0	0	0	0
Total identified sphingolipids	4247.83	4026.26	2520.97	19.2858	23.5714	35.4001	9486.58	10034.6	9722.95	10.8886	13.2454	12.7293	34.8079	41.1765	31.6334	9.3649	12.2155	9.17239	7.54074	7.62846	6.38049	19.9127	24.946	34.2094	7.21565	5.52034	6.33994	23.1431	6.22972	4.6505

## Sheet: Source Data_Dataset EV3
	A431 CTRL			SPTLC2-KO			SPTLC2-KO+WT-SPTLC2-FLAG					Statistical analysis using GraphPad Prism
pmol/ug protein	CTRL-1	CTRL-2	CTRL-3	KO-1	KO-2	KO-3	KO+WT-1	KO+WT-2	KO+WT-3			Unpaired two-sided t-test with Welch's correction for unequal variance
Sph(d18:1)	0.0303248	0.064233	0.042063	0.0057725	0.00471023	0.00667629	0.0220391	0.0370624	0.0519206
Cer(d18:1/12:0)	0	3.7e-05	5.05e-05	0	0	0	4.36e-05	7.74e-05	0.000150136			Column B	KO		Column C	KO+WT
Cer(d18:1/14:0)	4.04e-06	0.000950791	0.000614915	0	0	0	0.00143434	0.00214793	0.00352274			vs.	vs.		vs.	vs.
Cer(d18:1/15:0)	3.82e-05	0.000141697	9.23e-05	0	0	0	6.13e-05	0.000145841	0.000262765			Column A	CTRL		Column B	KO
Cer(d18:1/16:0)	0.000828589	0.00164732	0.00178112	6.79e-05	0	0	0.00232071	0.00228087	0.00545985
Cer(d18:0/16:0)	6.64e-06	0.000461806	0.000643863	0	0	0	0.000848859	0.00074581	0.00195232			Unpaired t test with Welch's correction			Unpaired t test with Welch's correction
Cer(d18:1/18:0)	0.000237373	0.000285835	0.000362791	0	0	0	0.0010085	0.00111873	0.00222674			P value	0.0461		P value	0.0398
Cer(d18:1/20:0)	0.000172468	0.000223417	0.000203111	0.000167676	0.000159897	9.17e-05	0.000889096	0.00127795	0.00220176			P value summary	*		P value summary	*
Cer(d18:1/22:1)	0.000452605	0.000924498	0.000354145	0	0	0	0.00138451	0.00239535	0.00350522			Significantly different (P < 0.05)?	Yes		Significantly different (P < 0.05)?	Yes
Cer(d18:1/22:0)	0.00159235	0.00273287	0.0019466	0	0	0	0.00773199	0.00750194	0.0146899			One- or two-tailed P value?	Two-tailed		One- or two-tailed P value?	Two-tailed
Cer(d18:1/23:1)	0.00039265	0.000801038	0.000490554	0	0	0	0.0010505	0.00146985	0.00216225			Welch-corrected t, df	t=4.470, df=2.011		Welch-corrected t, df	t=4.855, df=2.003
Cer(d18:1/23:0)	0.000229675	0.00038356	0.000189894	0	0	0	0.000430566	0.000410565	0.000947818
Cer(d18:1/25:1)	0.000142697	0.000181958	0.000180983	0	0	0	0.000156433	0.00019644	0.000270102			How big is the difference?			How big is the difference?
Cer(d18:1/24:1)	0.0151349	0.0257314	0.0152021	0.000757504	0.000365907	0.000567427	0.0360743	0.0313647	0.0552191			Mean of column A	0.2038		Mean of column B	0.01161
Cer(d18:1/24:0)	0.00801152	0.0142831	0.0103358	0.000360085	0.000187663	0.000233401	0.0205943	0.0144177	0.0275646			Mean of column B	0.01161		Mean of column C	0.3786
Cer(d18:1/23:0(OH))	0.000651134	0.00114197	0.000937214	0	0	0	0.0019864	0.00108366	0.0021693			Difference between means (B - A) ± SEM	-0.1921 ± 0.04299		Difference between means (C - B) ± SEM	0.3670 ± 0.07560
Cer(d18:1/25:0)	0.000226754	0.000490305	0.000323994	0	0	0	0.000340216	0.000271004	0.00041685			95% confidence interval	-0.3762 to -0.008134		95% confidence interval	0.04226 to 0.6918
Cer(d18:1/24:0(OH))	0.00105716	0.00239733	0.0017936	0	0	0	0.00130917	0.00182583	0.00287996			R squared (eta squared)	0.9086		R squared (eta squared)	0.9217
Cer(d18:0/24:0)	0.000135132	0.000208508	0.000154116	0	0	0	0.000132468	0.000150927	0.000227399
Cer(d18:1/26:1)	0.000773043	0.00132472	0.000732695	0	0	0	0.00147568	0.000943871	0.00161695			F test to compare variances			F test to compare variances
Cer(d18:1/26:0)	0.000193124	0.000425792	0.000198762	0	0	0	0.000435025	0.000234999	0.000408776			F, DFn, Dfd	376.2, 2, 2		F, DFn, Dfd	1166, 2, 2
HexCer(d18:1/14:0)	0.00013903	0.000339254	8.84e-05	5.9e-05	0	3.18e-05	0.000577428	0.000750011	0.00116071			P value	0.0053		P value	0.0017
HexCer(d18:1/15:0)	3.55e-05	0.000109685	4.25e-05	2.49e-05	0	0	0.000164012	0.000232279	0.000307567			P value summary	**		P value summary	**
HexCer(d18:1/16:0)	0.00240515	0.00514337	0.00271503	0.000636328	0.000340915	0.000384606	0.00733196	0.0076281	0.0139963			Significantly different (P < 0.05)?	Yes		Significantly different (P < 0.05)?	Yes
HexCer(d18:1/17:0)	6.06e-05	0.000175524	8.82e-05	0	0	0	0.00016793	0.000169373	0.000428526
HexCer(d18:1/18:0)	4.33e-05	3.39e-05	5.46e-05	0	0	0	0.00021288	0.000286139	0.000430099			Data analyzed			Data analyzed
HexCer(d18:1/19:1)	0.000285429	0.000352411	0.000181813	7.15e-05	0	0	0.00048223	0.000426815	0.000661142			Sample size, column A	3		Sample size, column B	3
HexCer(d18:1/20:0)	2.92e-05	0	4.86e-05	0	0	0	0.000291558	0.000237374	0.000381824			Sample size, column B	3		Sample size, column C	3
HexCer(d18:1/21:1)	8.3e-05	0.00011613	6.26e-05	6.78e-06	0	0	0.000438588	0.000247065	0.000494342
HexCer(d18:1/21:0)	0.000107969	0	0	6.79e-05	0	0	0.000166312	0.000184015	0.000474186
HexCer(d18:1/22:1)	0.000756467	0.00102139	0.000297004	0	0	0	0.00229802	0.0031923	0.00449262
HexCer(d18:1/22:0)	0.00407755	0.00759056	0.00464628	0.000448413	0	0	0.0189858	0.0162663	0.0335738
HexCer(d18:1/22:2(OH))	0.000586753	0.00120653	0.000490343	0	0	0	0.00162353	0.00168011	0.00276939
HexCer(d18:1/23:0)	0.00161476	0.00276316	0.00167157	0.000151737	0	3.53e-05	0.00345459	0.00329204	0.00573149
HexCer(d18:1/22:0(OH))	0.00126657	0.00273269	0.00171351	0.00017419	0	7.41e-05	0.00277688	0.00475308	0.00816925
HexCer(d18:2/24:1)	0.00117819	0.00250497	0.00104985	0.000110362	0.00015273	0.000109972	0.00194685	0.00172055	0.0024075
HexCer(d18:1/24:2)	0.000367694	0.000667861	0.000392688	0.000149234	0	0	0.00108845	0.000760379	0.0012303
HexCer(d18:1/24:1)	0.0306959	0.0500617	0.0228905	0.00301574	0.00109171	0.00111365	0.0610888	0.0546946	0.0982399
HexCer(d18:1/24:0)	0.0243415	0.049572	0.0310768	0.00210968	0.000780862	0.000804984	0.0474536	0.033117	0.0679713
HexCer(d18:1/25:1)	0.000508054	0.000956124	0.000450268	0	0	0	0.000866201	0.000783883	0.00108062
HexCer(d18:1/24:1(OH))	0.00180916	0.00407908	0.00207454	0.000144743	0	0	0.00220368	0.00319072	0.0054526
HexCer(d18:1/25:0)	0.000844917	0.00182315	0.00103159	0	0	0	0.00100641	0.000711111	0.00146891
HexCer(d18:1/24:0(OH))	0.00710551	0.0184366	0.0125511	0.00102388	0.000403956	0.000428947	0.00715745	0.00884567	0.0162207
HexCer(d18:1/26:1)	0.00243128	0.00440752	0.0019883	0	0	0	0.00272799	0.0021641	0.00351219
HexCer(d18:1/26:0)	0.000928075	0.00206505	0.00137724	0	0	0	0.00128183	0.000711406	0.00109175
LacCer(d18:1/14:0)	0.000104788	0.000197395	0.000105367	0	0	0	0.00117455	0.00179167	0.00262151
LacCer(d18:1/16:0)	0.000768143	0.00152078	0.000882151	0.000165318	9.38e-05	0.000134082	0.00855706	0.00984718	0.0169608
LacCer(d18:1/22:0)	0.000662413	0.00111114	0.00068167	0	0	0	0.00755185	0.00678664	0.0145324
LacCer(d18:1/24:2)	0	0	0	0	0	0	0.000272341	0.000299938	0.00041243
LacCer(d18:1/24:1)	0.00243486	0.00388202	0.00175265	0.000144942	0	0	0.0121961	0.0125937	0.0210776
LacCer(d18:1/24:0)	0.00250472	0.00476926	0.00261661	0.000135828	0	4.24e-05	0.012292	0.00857271	0.0177279
Gala1-4GalB1-4GlcB-Cer(d18:1/22:0)	0.000452971	0.000793945	0.000609242	0	0	0	0.0009506	0.00124559	0.00298419
Gala1-4GalB1-4GlcB-Cer(d18:1/24:1)	0.000560063	0.00112787	0.000621221	3.62e-05	0	0	0.000721068	0.000833209	0.00163419
Total	0.149794	0.288569	0.172904	0.0158023	0.00828767	0.0107287	0.311256	0.295139	0.529473
